# Supplementary material
Source: Springer Nature journal article supplement (https://www.springermedizin.de/resource/supplementary/12936_2012_2448_MOESM4_ESM.pdf/9542700)

**A**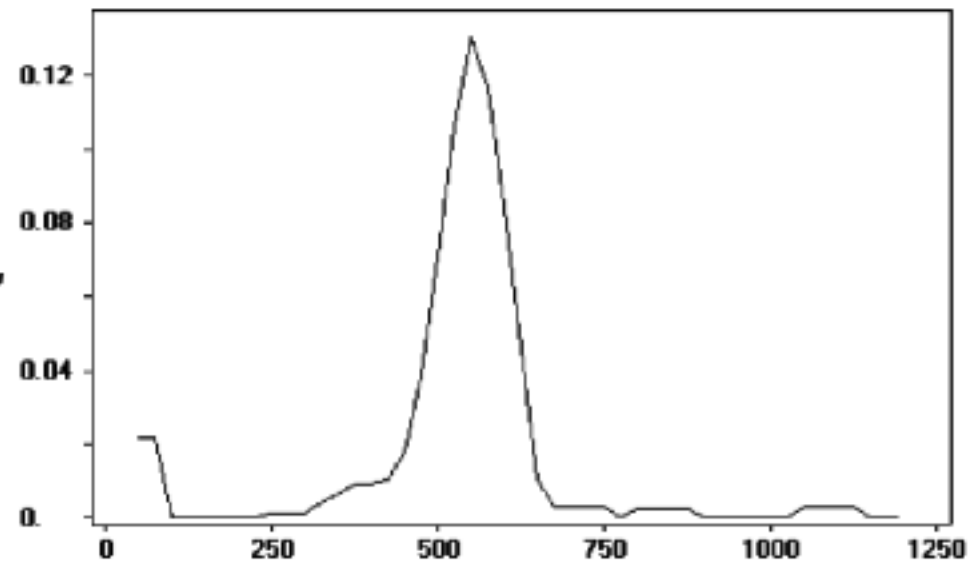**Nucleotide position****B**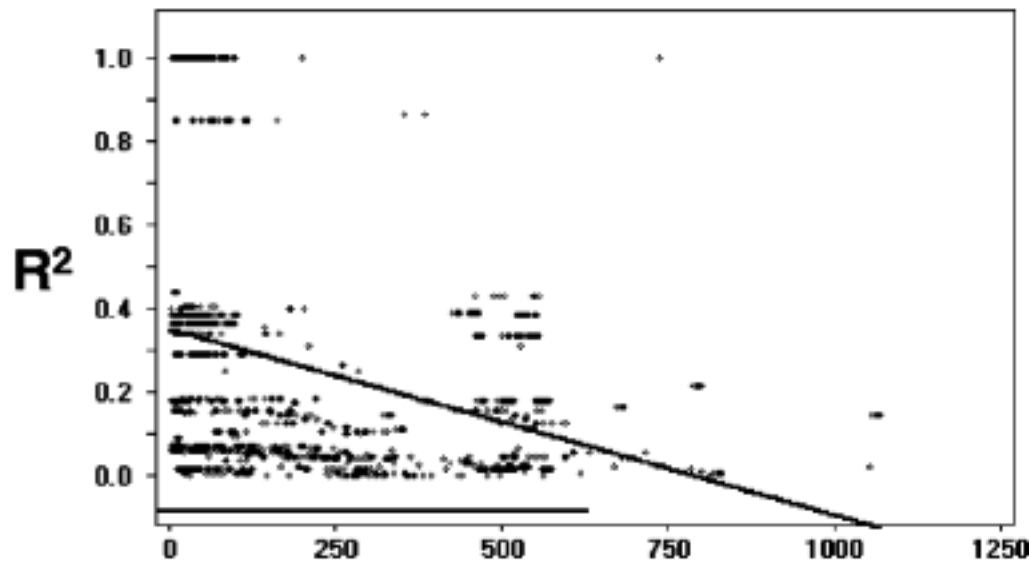**Nucleotide position**

Supplement: MOESM4 [file 9542700]
